# Supplementary material
Source: MDPI journal article supplement (https://www.mdpi.com/2072-4292/15/11/2914)
Supplement: s1 [file s1]

Supplementary Material for

# Prediction of land surface temperature considering future land use change effects under climate change scenarios in Nanjing City, China

Lei Tian <sup>1</sup>, Yu Tao <sup>1,2</sup>, Mingyang Li <sup>1,\*</sup>, Chunhua Qian <sup>3</sup>, Tao, Li <sup>1</sup>, Yi, Wu <sup>1</sup>, and Fang Ren <sup>1</sup>

<sup>1</sup> Co-Innovation Center for Sustainable Forestry in Southern China, Nanjing Forestry University, Nanjing 210037, China; tianlei@njfu.edu.cn (L.T.); litao3014@njfu.edu.cn (T.L.); Wuyi\_0416F@163.com (Y.W.); renfang@njfu.edu.cn (F.R.)

<sup>2</sup> Anhui Province Key Laboratory of Physical Geographical Environment, Chuzhou 239000, China; taoyu@chzu.edu.cn (Y.T.)

<sup>3</sup> College of Smart Agricultural, Suzhou Polytechnic Institute of Agriculture, Suzhou 215008, China; chqian@szai.edu.cn (C.Q.)

\* Correspondence: lmy196727@njfu.edu.cn (M.L.)

## Supplementary Tables

**Table S1.** Spatial driving factors of the land use change in this study. Note: CLCD, China land cover dataset [1]; DEM, digital elevation model; LULC, land use and land cover.

| Categories                        | Data                         | Year      | Original resolution | Data resource                                           |
|-----------------------------------|------------------------------|-----------|---------------------|---------------------------------------------------------|
| LULC data                         | Land use and land cover data | 1990–2020 | 30 m                | CLCD dataset                                            |
|                                   | Population                   | 2019      | 1000 m              | https://www.resdc.cn                                    |
|                                   | GDP                          | 2019      | 1000 m              |                                                         |
|                                   | Distance to governments      | 2020      | 30 m                | https://lbs.amap.com                                    |
|                                   | Distance to train stations   |           |                     |                                                         |
|                                   | Distance to highways         | 2020      | 30 m                | OpenStreetMap<br>https://www.openstreetmap.org          |
| Socioeconomic driver              | Distance to primary roads    |           |                     |                                                         |
|                                   | Distance to secondary roads  |           |                     |                                                         |
|                                   | Distance to tertiary roads   |           |                     |                                                         |
|                                   | Distance to trunk roads      | 2020      | 30 m                | https://www.webmap.cn                                   |
|                                   | Distance to railroads        |           |                     |                                                         |
|                                   | Distance to residents        | 2020      | 30 m                | LULC in 2020<br>https://eogdata.mines.edu/products/vnl/ |
|                                   | Distance to water            | 2020      |                     |                                                         |
|                                   | Nighttime lights             | 2020      |                     |                                                         |
| Climatic and environmental driver | DEM                          | 2019      | 30 m                | ASTER GDEM 30 M dataset                                 |
|                                   | Slope                        |           |                     |                                                         |
|                                   | Soil types                   | 1995      | 30 m                | https://www.resdc.cn                                    |
|                                   | Average annual temperature   | 1990–2020 | 1000 m              | http://www.geodata.cn                                   |
|                                   | Average annual precipitation |           |                     |                                                         |

**Table S2.** Calculation of the potential driving factor of LST (land surface temperature).

| Driving factors                            | Abbreviations | Calculation formula                                                                                                                                          | References |
|--------------------------------------------|---------------|--------------------------------------------------------------------------------------------------------------------------------------------------------------|------------|
| Normalized difference vegetation index     | NDVI          | $= (\rho_{NIR} - \rho_{Red}) / (\rho_{NIR} + \rho_{Red})$                                                                                                    | [2]        |
| Normalized difference built-up index       | NDBI          | $= (\rho_{SWIR1} - \rho_{NIR}) / (\rho_{SWIR1} + \rho_{NIR})$                                                                                                | [3]        |
| Soil adjusted vegetation index             | SAVI          | $= (1 + L) * (\rho_{NIR} - \rho_{Red}) / (\rho_{NIR} + \rho_{Red} + L), L = 0.5$                                                                             | [4]        |
| Modified normalized difference Water Index | MNDWI         | $= (\rho_{Green} - \rho_{SWIR1}) / (\rho_{Green} + \rho_{SWIR2})$                                                                                            | [5]        |
| Tasseled cap transformation (greenness)    | TCG           | $= (-0.1603 * \rho_{Blue}) + (-0.2819 * \rho_{Green}) + (-0.4934 * \rho_{Red}) + (0.7940 * \rho_{NIR}) + (-0.002 * \rho_{SWIR1}) + (-0.1446 * \rho_{SWIR2})$ | [6]        |
| Tasseled cap transformation (wetness)      | TCW           | $= (0.0315 * \rho_{Blue}) + (0.2021 * \rho_{Green}) + (0.3102 * \rho_{Red}) + (0.1594 * \rho_{NIR}) + (-0.6806 * \rho_{SWIR1}) + (-0.6109 * \rho_{SWIR2})$   | [6]        |
| Impervious surface distribution density    | ISDD          | $= \frac{\sum_{i=1}^n B_{si} \times (1 - \frac{D_i}{2r})}{\sum_{i=1}^n (1 - \frac{D_i}{2r})}$                                                                | [7]        |
| Cropland distribution density              | CDD           |                                                                                                                                                              |            |

|                             |     |
|-----------------------------|-----|
| Forest distribution density | FDD |
| Water distribution density  | WDD |

Note:  $\rho_{Blue}$  represents the blue spectrum;  $\rho_{Green}$  represents the green spectrum;  $\rho_{Red}$  represents the red spectrum;  $\rho_{NIR}$  represents the near-infrared spectrum;  $\rho_{SWIR1}$  represents the short-wavelength infrared 1 spectrum; and  $\rho_{SWIR2}$  represents the short-wavelength infrared 2 spectrum.

### Supplementary Figures

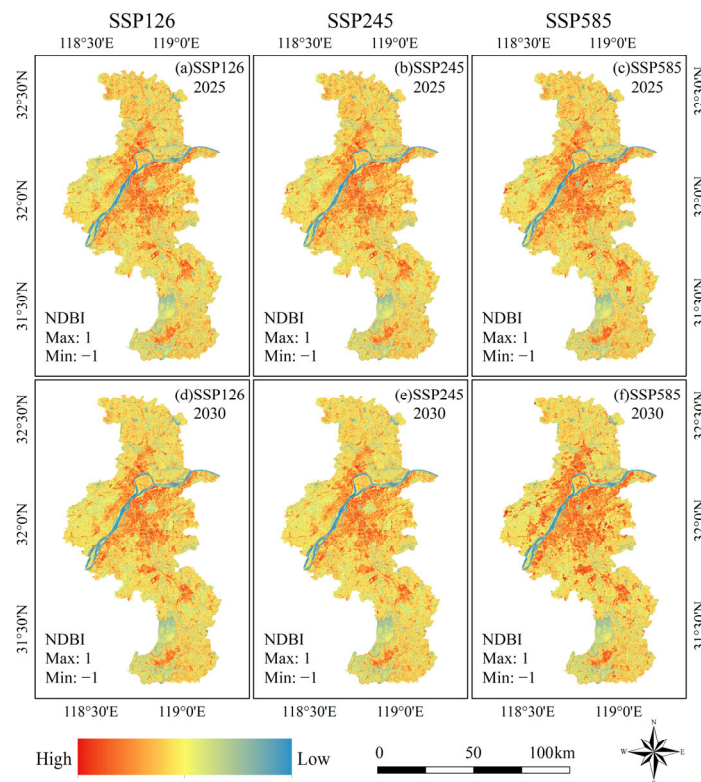

**Figure S1.** Simulation of NDBI (normalized difference built-up index) in Nanjing under different climate change scenarios.

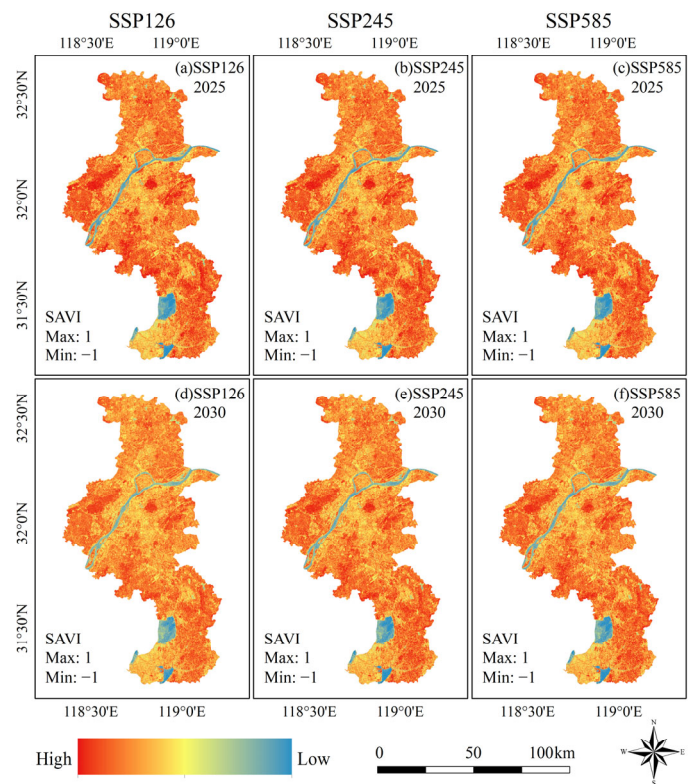

**Figure S2.** Simulation of SAVI (soil-adjusted vegetation index) in Nanjing under different climate change scenarios.

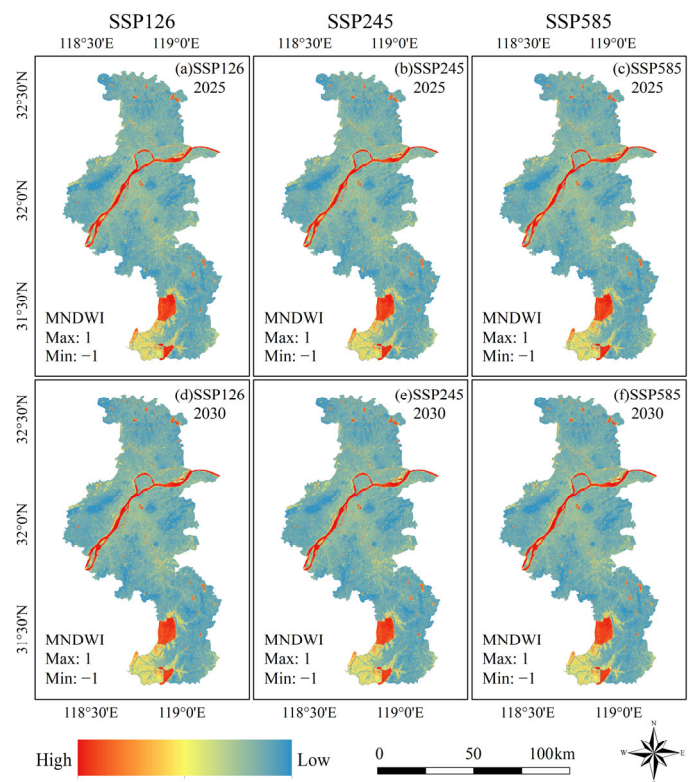

**Figure S3.** Simulation of MNDWI (modified normalized difference water index) in Nanjing under different climate change scenarios.

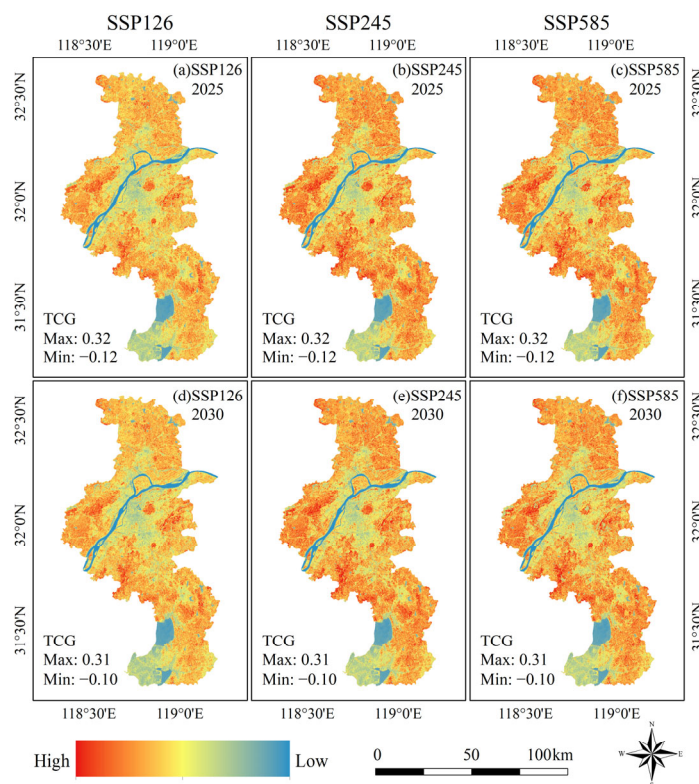

**Figure S4.** Simulation of TCG (tasseled cap greenness) in Nanjing under different climate change scenarios.

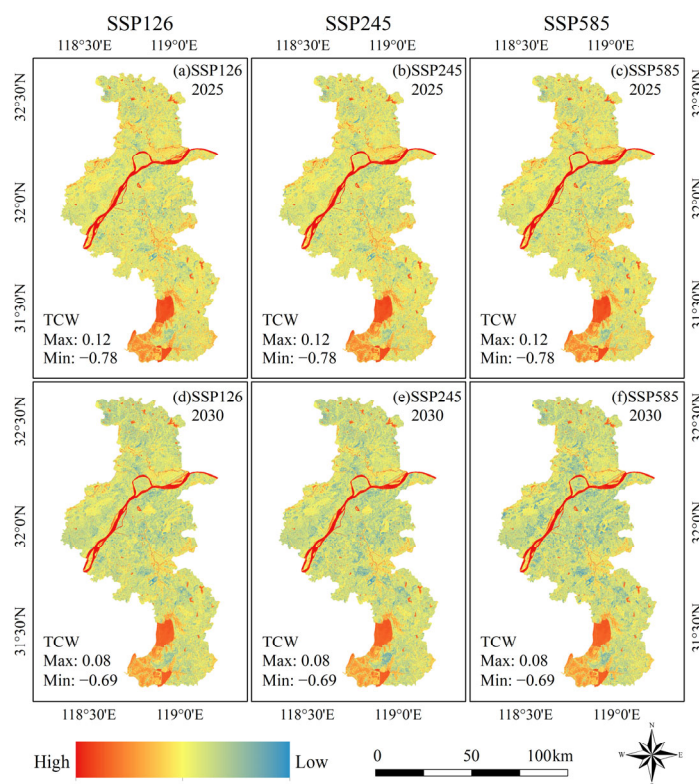

**Figure S5.** Simulation of TCW (tasseled cap wetness) in Nanjing under different climate change scenarios.

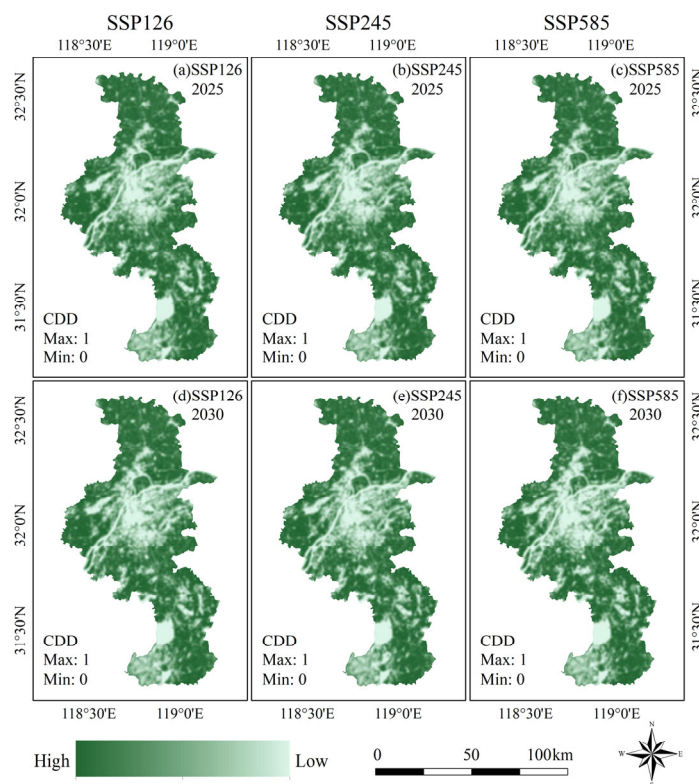

**Figure S6.** Simulation of CDD (cropland distribution density) in Nanjing under different climate change scenarios.

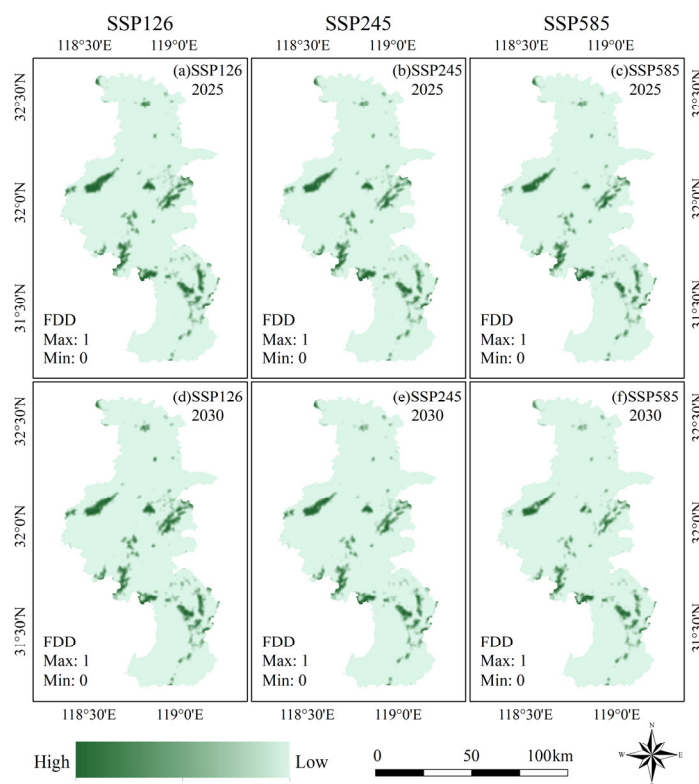

**Figure S7.** Simulation of FDD (forest distribution density) in Nanjing under different climate change scenarios.



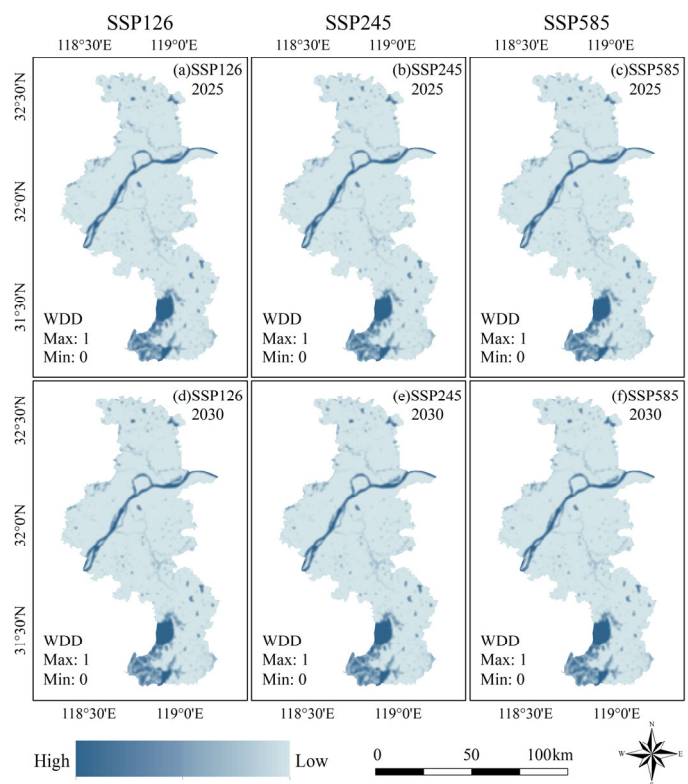

**Figure S8.** Simulation of WDD (water distribution density) in Nanjing under different climate change scenarios.

## References

1. Yang, J.; Huang, X. The 30 m annual land cover dataset and its dynamics in China from 1990 to 2019. *Earth Syst. Sci. Data* **2021**, *13*, 3907–3925, <https://doi.org/10.5194/essd-13-3907-2021>.
2. Tucker, C.J. Red and photographic infrared linear combinations for monitoring vegetation. *Remote Sens. Environ.* **1979**, *8*, 127–150, [https://doi.org/10.1016/0034-4257\(79\)90013-0](https://doi.org/10.1016/0034-4257(79)90013-0).
3. Zha, Y.; Gao, J.; Ni, S.X. Use of normalized difference built-up index in automatically mapping urban areas from TM imagery. *Int. J. Remote Sens.* **2003**, *24*, 583–594, <https://doi.org/10.1080/01431160304987>.
4. Huete, A.R. A soil-adjusted vegetation index (SAVI). *Remote Sens. Environ.* **1988**, *25*, 295–309, [https://doi.org/10.1016/0034-4257\(88\)90106-X](https://doi.org/10.1016/0034-4257(88)90106-X).
5. Xu, H.Q. Modification of normalised difference water index (NDWI) to enhance open water features in remotely sensed imagery. *Int. J. Remote Sens.* **2006**, *27*, 3025–3033, <https://doi.org/10.1080/01431160600589179>.
6. Crist, E.P. A TM Tasseled Cap equivalent transformation for reflectance factor data. *Remote Sens. Environ.* **1985**, *17*, 301–306, [https://doi.org/10.1016/0034-4257\(85\)90102-6](https://doi.org/10.1016/0034-4257(85)90102-6).
7. Meng, Q.Y.; Zhang, L.L.; Sun, Z.H.; Meng, F.; Wang, L.; Sun, Y.X. Characterizing spatial and temporal trends of surface urban heat island effect in an urban main built-up area: A 12-year case study in Beijing, China. *Remote Sens. Environ.* **2018**, *204*, 826–837, <https://doi.org/10.1016/j.rse.2017.09.019>.
